# Supplementary material
Source: PubMed Central journal article supplement (PMC5995507)
Supplement: supp_RA117.000953_133898_2_supp_127540_p7r7yt.pdf [file supp_RA117.000953_133898_2_supp_127540_p7r7yt.pdf]

## Supplementary Information

### Insights into the binding behavior of native and non-native cytochromes to Photosystem I from *Thermosynechococcus elongatus*

Adrian Kölsch<sup>1\*</sup>, Mahdi Hejazi<sup>1</sup>, Kai R. Stieger<sup>2</sup>, Sven C. Feifel<sup>2</sup>, Jan F. Kern<sup>3</sup>, Frank Müh<sup>4</sup>, Fred Lisdat<sup>2</sup>, Heiko Lokstein<sup>5</sup>, Athina Zouni<sup>1\*</sup>

<sup>1</sup>Humboldt-Universität zu Berlin, Institute for Biology, Biophysics of Photosynthesis, Philippstr. 13, 10115 Berlin, Germany

<sup>2</sup>University of Applied Sciences Wildau, Institute for Applied Life Sciences, Biosystems Technology, Hochschulring 1, 15745 Wildau, Germany

<sup>3</sup>Lawrence Berkeley National Laboratory, 1 Cyclotron Road, CA 94720 Berkeley, USA

<sup>4</sup>Johannes Kepler University Linz, Institute for Theoretical Physics, Department of Theoretical Biophysics, Altenberger Str. 69, 4040 Linz, Austria

<sup>5</sup>Charles University, Department of Chemical Physics and Optics, Ke Karlovu 3, CZ-121 16 Praha 2, Czech Republic

\*To whom correspondence should be addressed: A. Kölsch and Prof. A. Zouni, Humboldt-Universität zu Berlin, Institute for Biology, Biophysics of Photosynthesis, Philippstr. 13, 10115 Berlin, Germany. Telephone: +49 30209347930; FAX: +49 30209347934; E-mail: [koelscha@hu-berlin.de](mailto:koelscha@hu-berlin.de) and [athina.zouni@hu-berlin.de](mailto:athina.zouni@hu-berlin.de)

**Table S1**

MALDI-MS analysis of purified PS I. Following purification and crystallization, PS I crystals were dissolved in 5 mM MES-NaOH, pH 6.0 and 30 mM MgSO<sub>4</sub>. MS spectra were recorded in linear mode. The standard deviation is given for 12 independent PS I preparations.

|                       | PsaM       | PsaX       | PsaI       | PsaJ       | PsaE       | PsaK       | PsaC       | PsaF        | PsaD         | PsaL        |
|-----------------------|------------|------------|------------|------------|------------|------------|------------|-------------|--------------|-------------|
| Calculated mass* (Da) | 3424       | 4101       | 4166       | 4767       | 8389       | 8480       | 8800       | 15113       | 15370        | 16251       |
| Determined mass (Da)  | 3424<br>±2 | 3970<br>±2 | 4195<br>±2 | 4796<br>±2 | 8261<br>±3 | 8392<br>±3 | 8672<br>±3 | 15116<br>±7 | 15232<br>±12 | 16125<br>±9 |

\*Post translational modifications are described in (1).

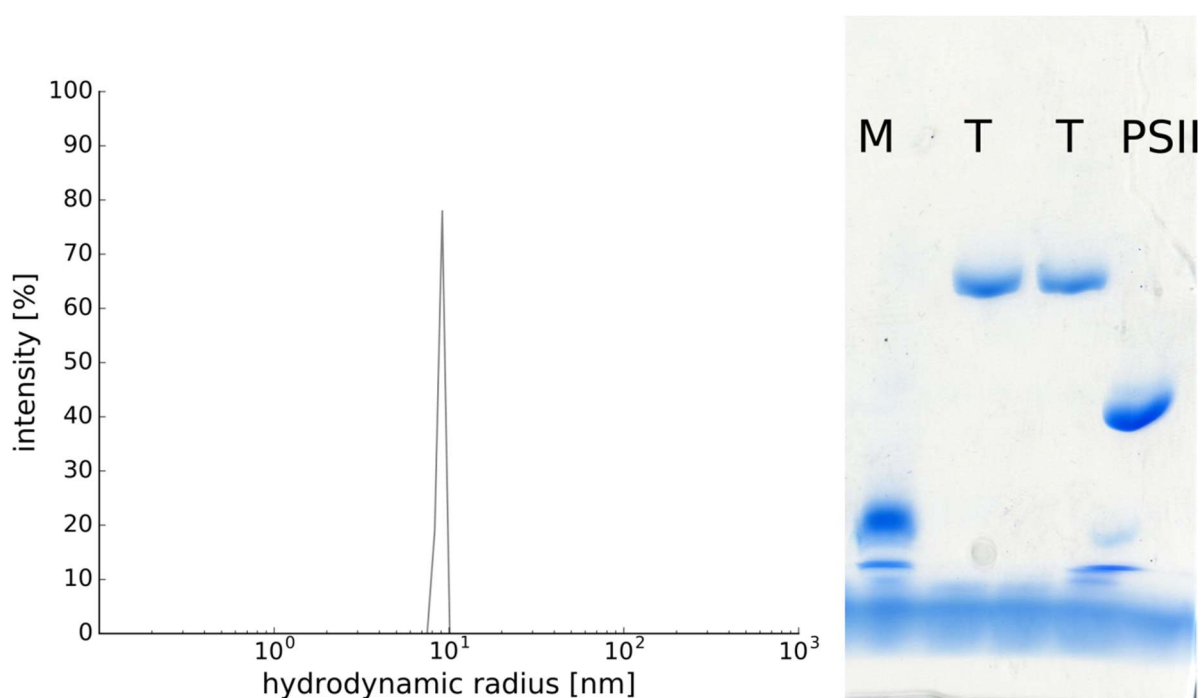

**Figure S1:** Hydrodynamic radius of trimeric PS I measured by dynamic light scattering (DLS, left) and blue native (BN) PAGE of trimeric PS I (T, 1000 kDa) in comparison to monomeric PS I (M, 340 kDa) and dimeric photosystem II (PSII, 750 kDa) (right). For DLS, PS I crystals were dissolved in 100 mM NaCl, 0.02 % DDM and 25 mM Tricine-NaOH, pH 8 to 5  $\mu$ M P<sub>700</sub> and filtered through a 0.2  $\mu$ m filter. For BN-PAGE, PS I crystals corresponding to 5  $\mu$ g of chlorophyll were dissolved in BN-solubilisation buffer containing 0.2 % DDM and applied to a gradient gel containing 3 to 9 % polyacrylamide.

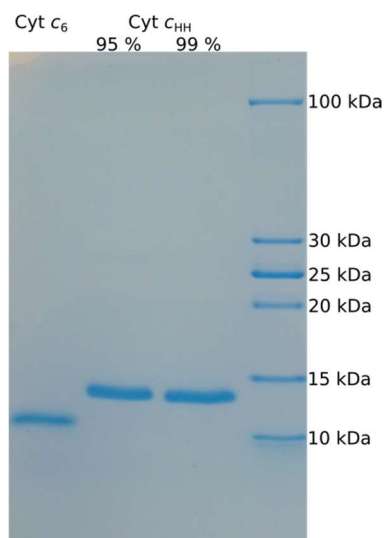

**Figure S2:** SDS-PAGE of purified cyt  $c_6$  and cyt  $c_{HH}$  at  $\geq 95\%$  and  $\geq 99\%$  purity, obtained from Sigma Aldrich (Germany). Homogeneity of the proteins was analyzed according to the protocol of Laemmli (2). Samples were denatured in sample buffer at  $95\text{ }^\circ\text{C}$  for 5 min and applied to a 15 % poly-acryl-amide gel.

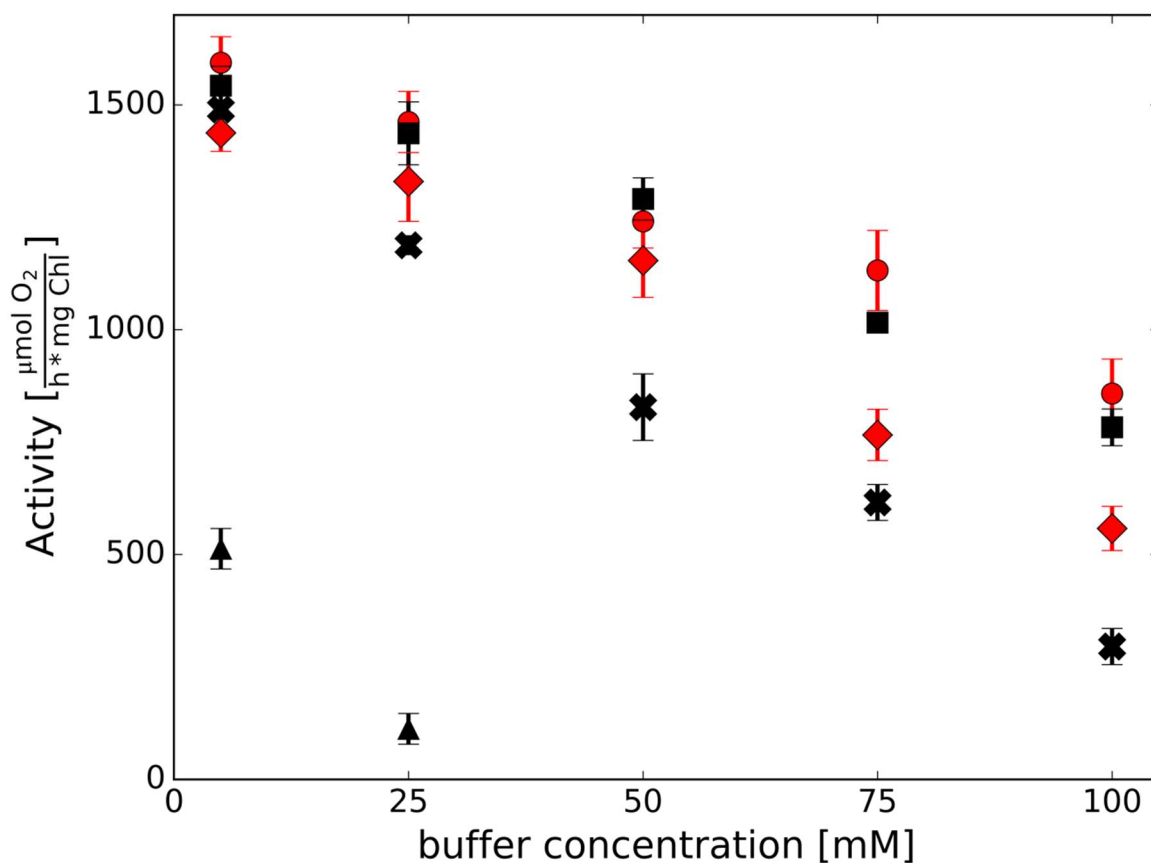

**Figure S3:** PS I - cyt  $c_{\text{HH}}$  oxygen reduction activity as a function of the buffer concentration. The activity was highest in Tricine (red circles) and Tris (black squares) buffer, while it was lower in HEPES (red diamond), MOPS (black cross) and phosphate buffer (black triangles) at pH 8 with 16  $\mu\text{M}$  cyt  $c_{\text{HH}}$ . Standard deviations result from three independent measurements.

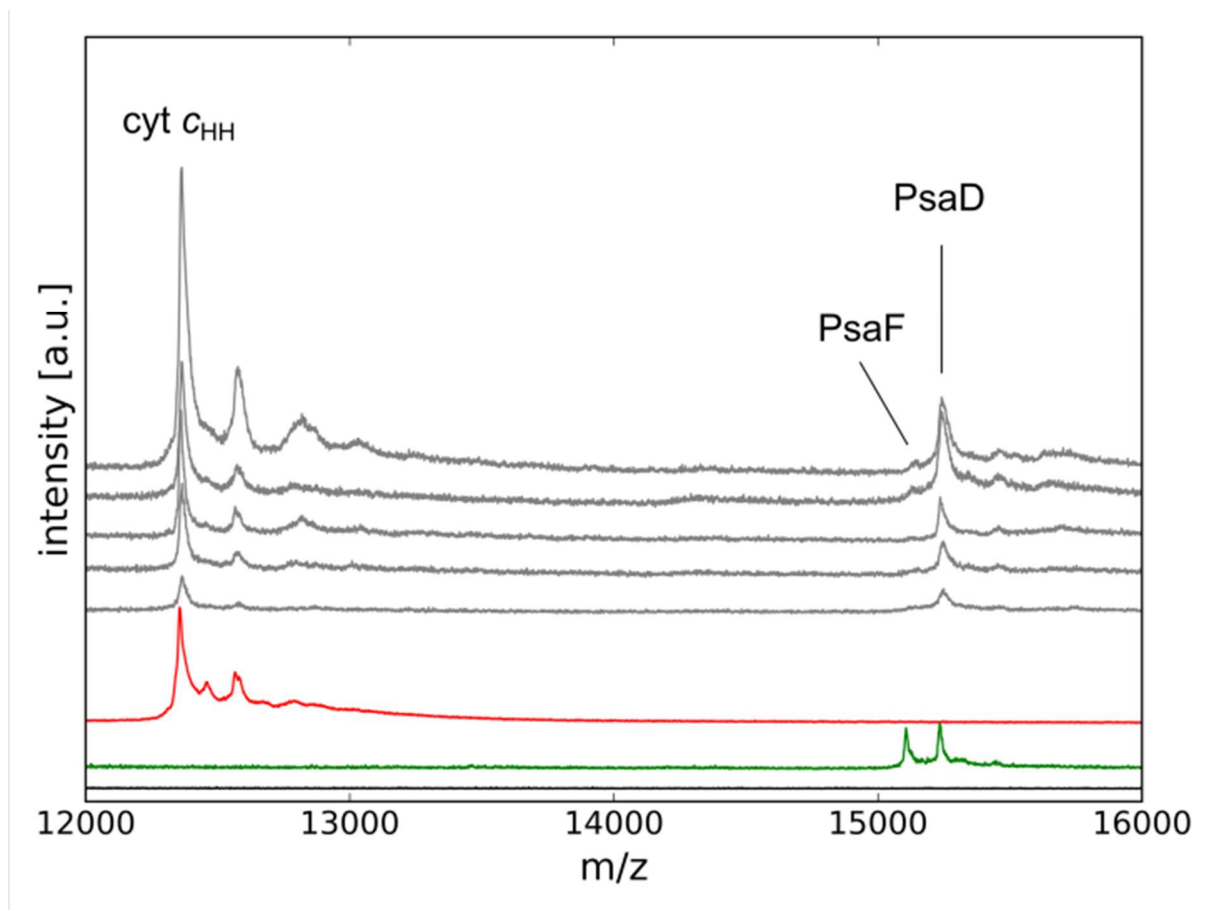

**Figure S4.** Section of MALDI-TOF analysis of single PS I - cyt  $c_{HH}$  co-crystals grown in 5 independent batches (grey spectra). For comparison, spectra of cyt  $c_{HH}$  (95 % purity) and PS I are shown in red and green, respectively. Crystals were washed six times prior to analysis to avoid contamination by free cyt  $c_{HH}$ . Neither cyt  $c_{HH}$  nor PS I are present in the supernatant from the last washing step (black spectrum).

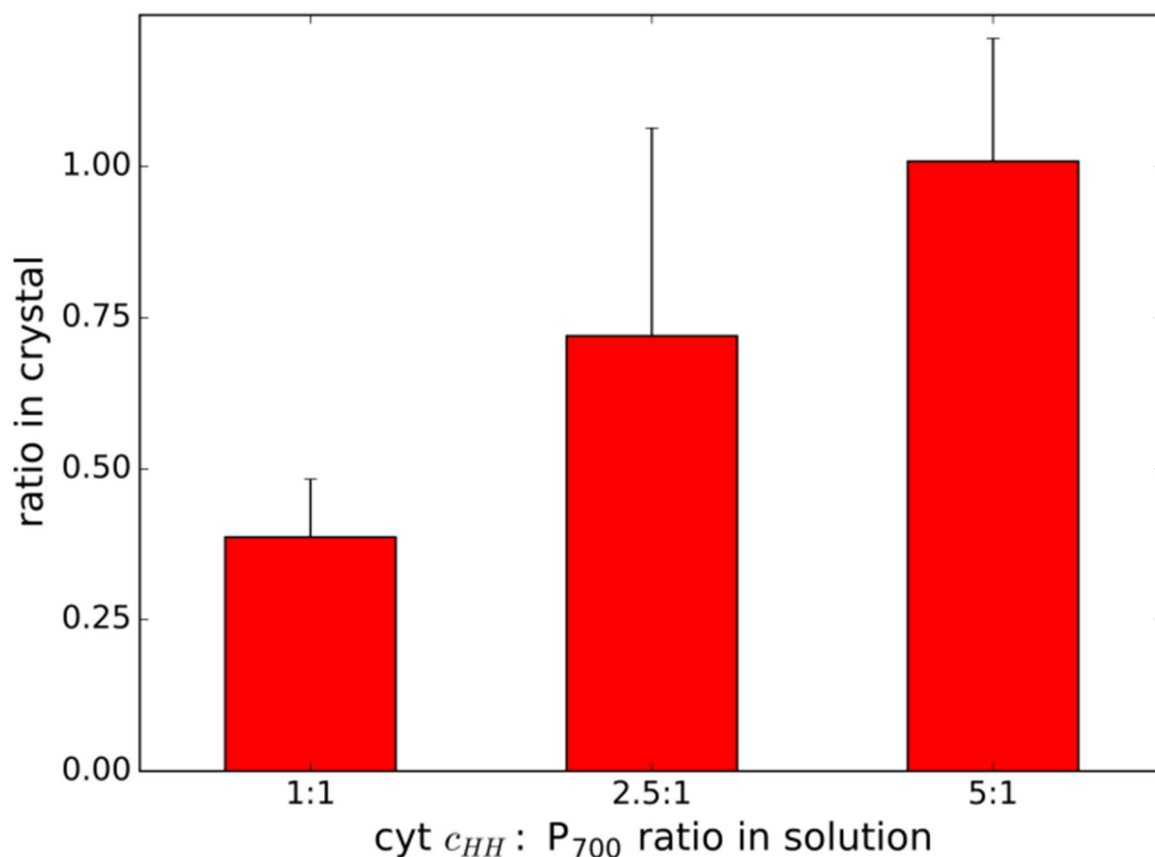

**Figure S5.** Ratio of cyt  $c_{HH}$  to P<sub>700</sub> in PS I-co-crystals. Batches of crystals were washed, dissolved and cyt  $c_{HH}$  was separated from PS I for photometric quantification. Standard deviations result from three to twelve independent measurements.

**Table S2**

X-ray data collection and refinement statistics. Values in parenthesis are for the high resolution shell.

| Statistics                           | Values                     |
|--------------------------------------|----------------------------|
| Wavelength (Å)                       | 0.999                      |
| Space Group                          | P6 <sub>3</sub>            |
| Cell Dimensions                      |                            |
| a, b, c (Å)                          | 281.4, 281.4, 165.6        |
| $\alpha$ , $\beta$ , $\gamma$ (°)    | 90, 90, 120                |
| Resolution (Å)                       | 47.36 – 3.42 (3.63 - 3.42) |
| Multiplicity                         | 15.88                      |
| I/ $\sigma$ I                        | 8.79 (1.75)                |
| R <sub>meas</sub>                    | 0.42 (1.60)                |
| Completeness (%)                     | 99.2 (97.0)                |
| No. of reflections                   | 99609                      |
| R <sub>work</sub> /R <sub>free</sub> | 0.2611/0.3169              |
| Rmsd Bond lengths (Å)                | 0.0162                     |
| Rmsd Bond angles (°)                 | 5.8874                     |

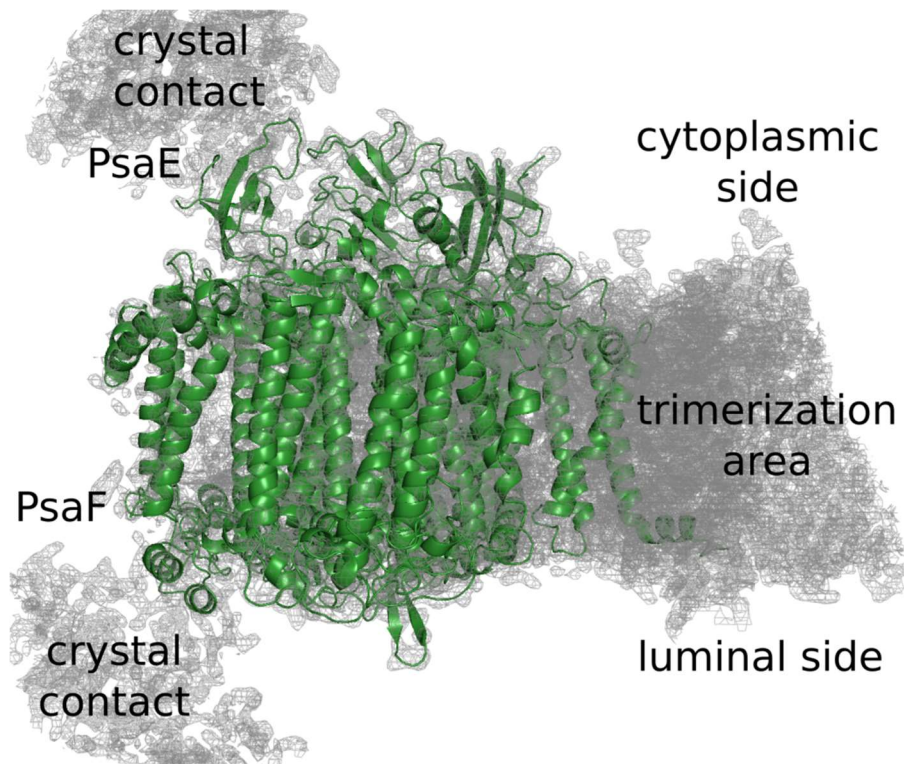

**Figure S6:** Electron density map (grey) of a PS I – cyt  $c_{HH}$  co-crystal at 3.4 Å resolution with the respective PS I model (green) at 2  $\sigma$  contour level. Crystal contacts are formed between PsaE on the cytoplasmic side and PsaF on the luminal side of PS I. All electron density can be assigned to PS I, and no density is found for cyt  $c_{HH}$ .

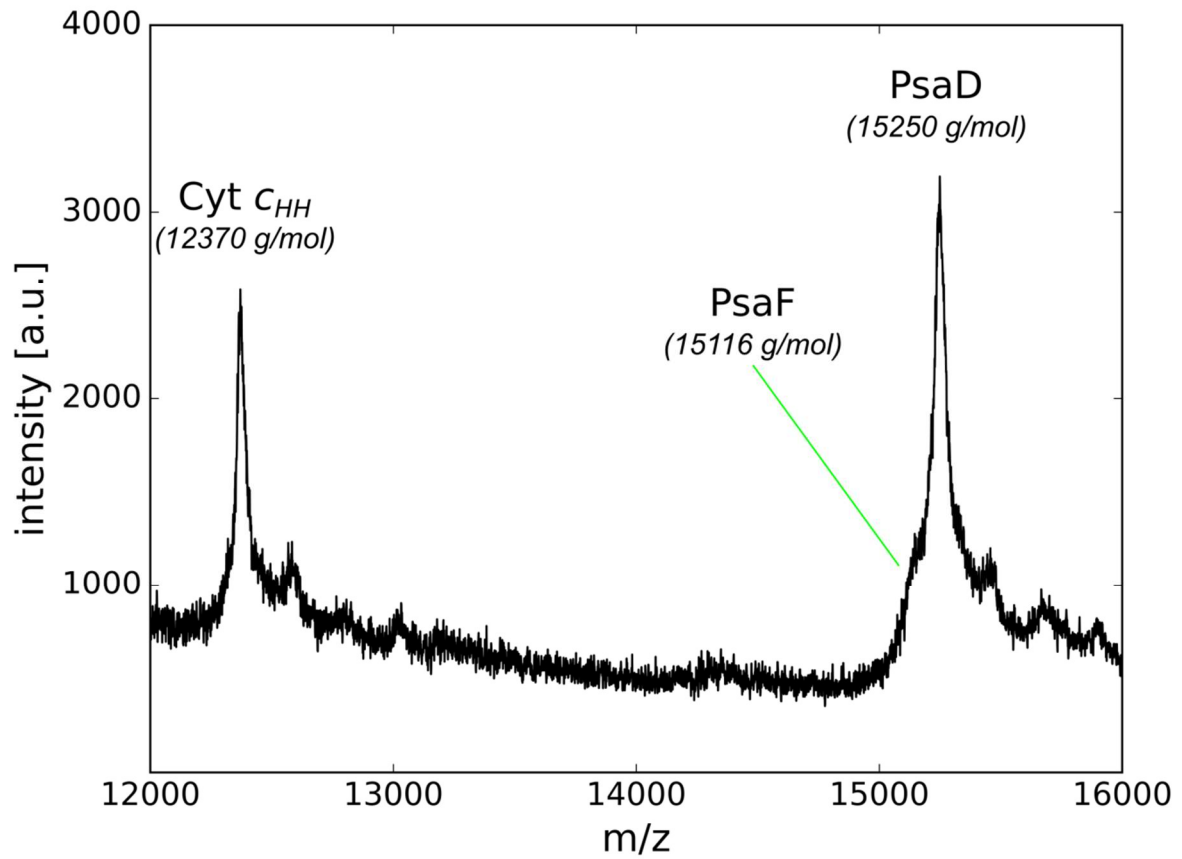

**Figure S7:** MALDI-TOF analysis of a single PS I cyt <sub>CHH</sub> co-crystal after structure analysis at BESSY II at 3.5 Å resolution. The cyt <sub>CHH</sub> peak is clearly visible, while not all subunits were found by MALDI-TOF, although they were present in the electron density map (e.g. PsaF).



**Table S3:** Solubility of PS I at high protein concentration and low salt concentration. PS I crystals were dissolved in Tricine pH 8.0 buffer containing 0.02 % DDM and 100 mM NaCl. The solution was slowly diluted to 30  $\mu\text{M}$  P<sub>700</sub> and its final NaCl concentration. The solution was filtered into a disposable cuvette and measured by dynamic light scattering. A high polydispersity (Pd) results from protein aggregation, while a low Pd indicates monodisperse proteins. Standard deviations result from three independent measurements.

| NaCl [mM] | Pd at 30 $\mu\text{M}$ P <sub>700</sub> [%] |
|-----------|---------------------------------------------|
| 10        | -                                           |
| 15        | 18 $\pm$ 3                                  |
| 20        | 10 $\pm$ 1                                  |
| 25        | 5 $\pm$ 1                                   |
| 30        | 5 $\pm$ 1                                   |
| 35        | 5 $\pm$ 1                                   |

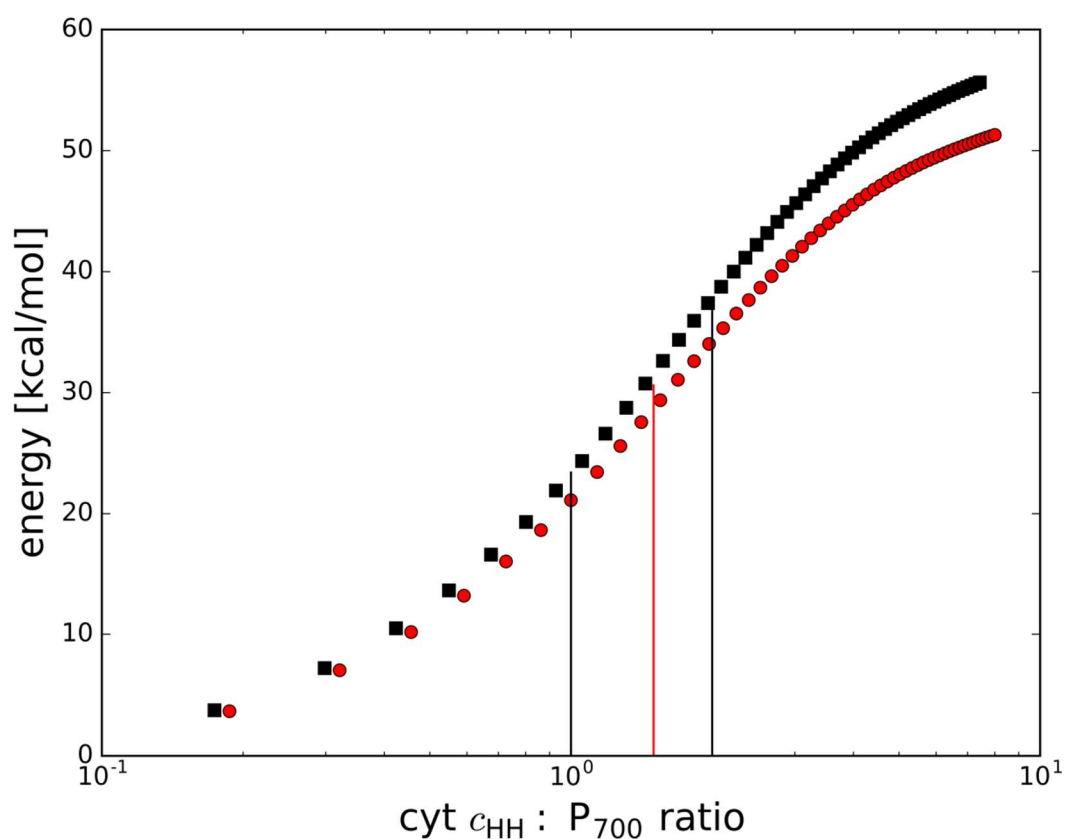

**Fig. S8:** ITC data from Fig. 4 in semilogarithmic representation. Shown is the summed energy of the titrations against the  $\text{cyt } c_{HH} : P_{700}$  ratio for measurements in oxidized (black squares) and reduced (red circles) conditions. The black vertical bars represent a ratio of 1 and 2, while the red bar represents the ratio of 1.5, which was calculated to be the number of binding sites by a model for one set of binding sites (Table 2).

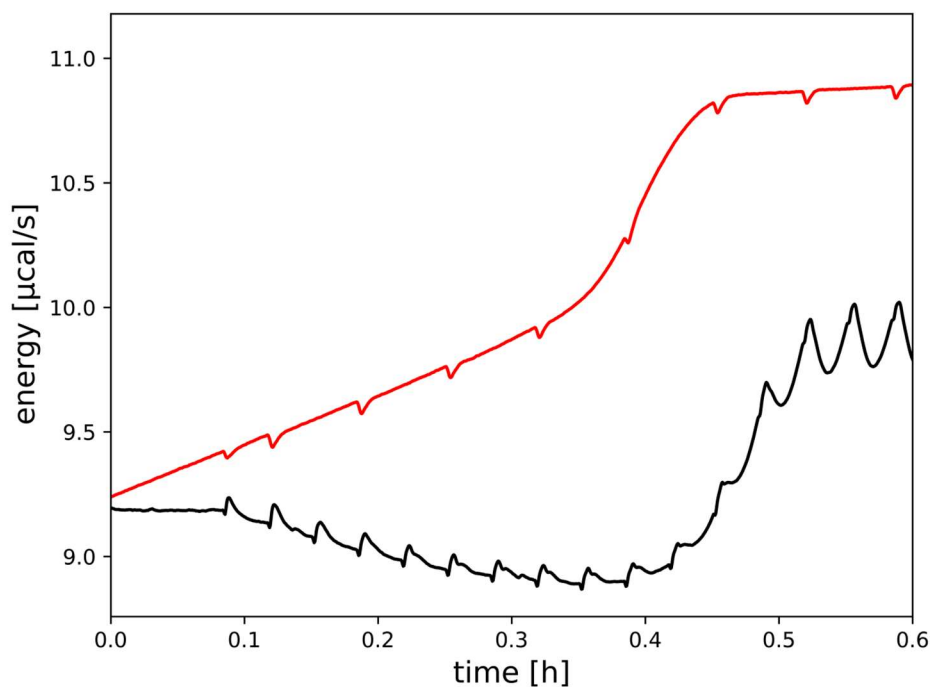

**Figure S9:** Isothermal titration calorimetry of PS I with cyt  $c_6$ . Thermogram for exemplary measurements with oxidized (black) and reduced (red) proteins. Measurements were performed at 20 °C in 25 mM Tricine buffer, pH 8.0 with 200 mM  $\text{MgSO}_4$  and 0.02 % DDM. Each titration step consisted of 5  $\mu\text{l}$  injected volume from 1 mM cyt  $c_6$  in 50  $\mu\text{M}$   $\text{P}_{700}$ . Measurements under reducing conditions were performed in the presence of 5 mM ascorbic acid and measurements under oxidizing conditions in the absence or presence of up to 15 mM  $\text{K}_3(\text{CN})_6\text{Fe}(\text{III})$ . A strong baseline shift appeared in all measurements under these conditions, indicating the presence of a reaction that cannot be described by a simple binding enthalpy model.

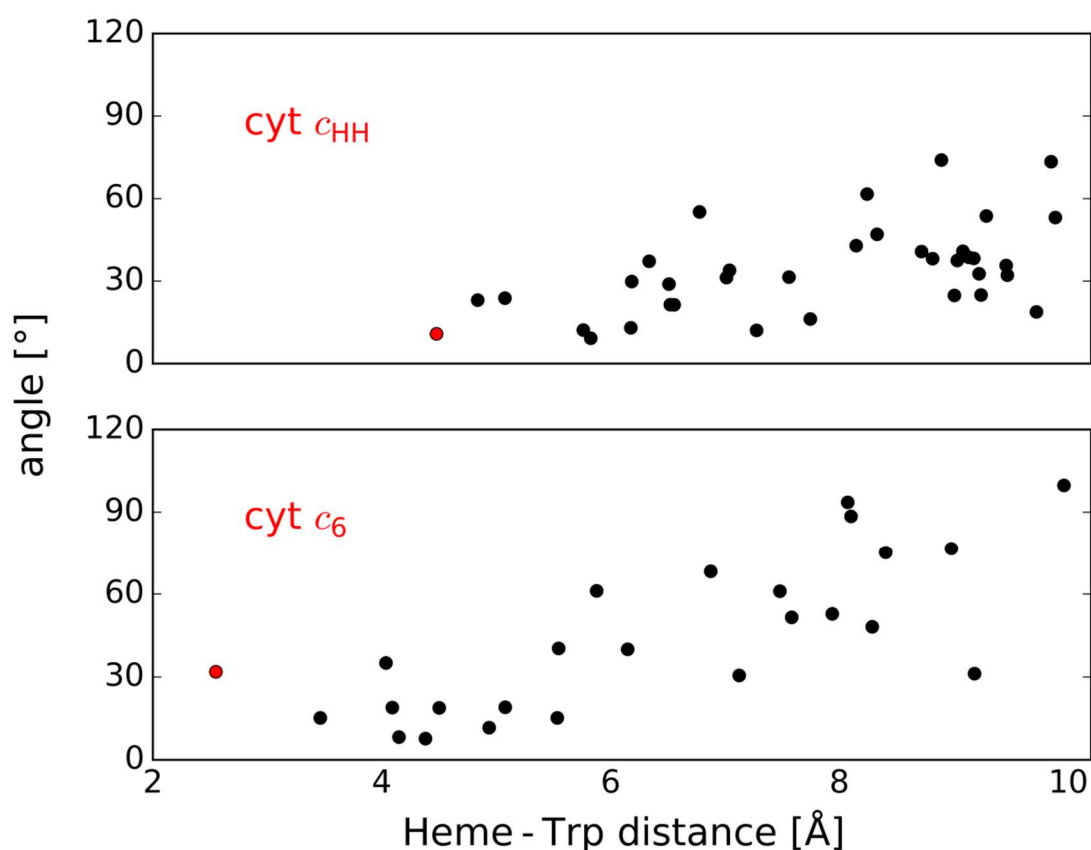

**Figure S10:** Cyt  $c_{HH}$  (top) and cyt  $c_6$  (bottom) can bind at the  $P_{700}$ -docking site in different orientations. The depicted docking states have less than 10 Å C-C distance between the heme group and the luminal tryptophan residues W(A655) and W(B632) and more than -15 kcal/mol binding energy. The angle was calculated between two lines, formed by the geometrical center of the cytochrome (g) with the iron from the heme group and by g with the Mg-ions of  $P_{700}$ . The docking states shown in Figure 6 are highlighted in red.

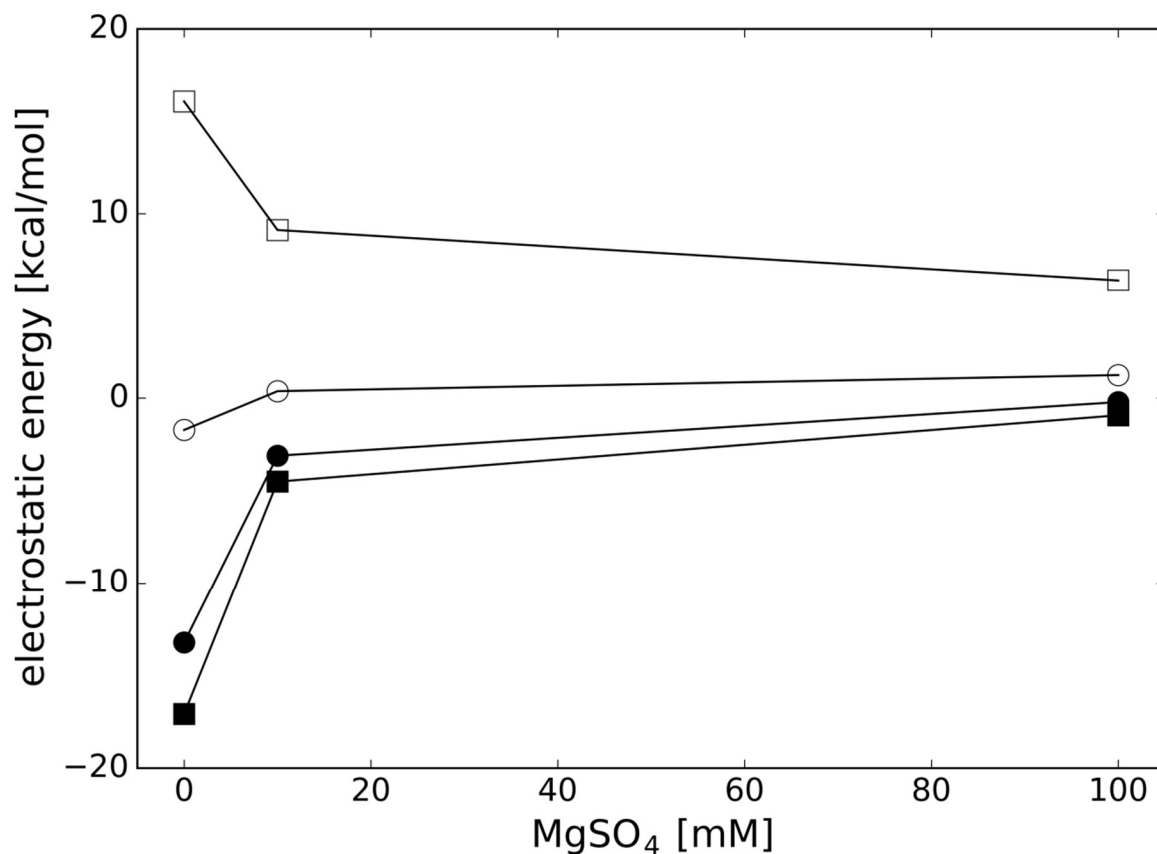

**Figure S11:** Re-calculation of electrostatic energy of the docking sites shown in Figure 6. Cyt  $c_{HH}$  (filled symbols) and cyt  $c_6$  (open symbols) were calculated at pH 6 (circles) and pH 8 (squares) in the presence of 0, 10 and 100 mM  $MgSO_4$  by using the Poisson-Boltzmann equation. The protein dielectric constant was set to 10, and the temperature to 20 °C. For cyt  $c_6$  a 6x His-tag with random conformation was added to the protein-structure. Calculations performed by the adaptive Poisson-Boltzmann solver (APBS 1.4) with amber force field.

**Table S4**

Distance between cyt *c*<sub>6</sub> and PS I residues derived from the docking site shown in Figure 6.

| Residue cyt <i>c</i> <sub>6</sub> | Residue PS I | Distance [Å] | expected perturbation * |
|-----------------------------------|--------------|--------------|-------------------------|
| ARG64                             | PsaB GLN636  | 1.5          | significant             |
| MET26                             | PsaA ILE634  | 2.2          | not homolog             |
| MET19                             | PsaA ASN638  | 2.2          | significant             |
| ALA16                             | PsaA ARG651  | 2.3          | not homolog             |
| ALA57                             | PsaA SER659  | 2.4          | significant             |
| VAL25                             | PsaA ARG750  | 2.4          | strong                  |
| GLY12                             | PsaB ASN639  | 2.5          | significant             |
| HEM88                             | PsaA TRP655  | 2.5          |                         |
| SER11                             | PsaB ASN642  | 2.6          | strong                  |
| ASN13                             | PsaB GLN636  | 2.6          | strong                  |
| GLY20                             | PsaB PHE644  | 2.6          | not significant         |
| GLY63                             | PsaB LYS738  | 2.7          | not significant         |
| LEU65                             | PsaB GLN636  | 2.8          | significant             |
| VAL24                             | PsaA ASP652  | 2.9          | strong                  |
| ALA27                             | PsaA ILE634  | 3.0          | strong                  |
| ALA15                             | PsaB PHE644  | 3.0          | significant             |
| CYS17                             | PsaA TRP655  | 3.0          | significant             |
| PRO59                             | PsaA TRP655  | 3.2          | not significant         |
| PHE61                             | PsaB GLN636  | 3.3          | strong                  |
| ASN23                             | PsaA THR635  | 3.4          | significant             |

\*NMR signals of cyt *c*<sub>6</sub> amino acids from *Nostoc* sp. PCC 7119 which were perturbed after addition of PS I (3).

**Table S5**

Distance between cyt  $c_{HH}$  and PS I residues derived from the docking site shown in Figure 6.

| Residue cyt $c_{HH}$ | Residue PS I | Distance [Å] |
|----------------------|--------------|--------------|
| THR28                | PsaB TRP631  | 2.6          |
| LYS25                | PsaA ILE634  | 2.7          |
| ILE81                | PsaB GLN636  | 2.7          |
| GLN16                | PsaA ARG651  | 3.0          |
| HEM105               | PsaB SER635  | 3.3          |
| GLN12                | PsaB PHE644  | 3.3          |
| PHE82                | PsaB GLN636  | 3.5          |
| LYS72                | PsaB GLN636  | 3.5          |
| GLY77                | PsaB GLU609  | 3.7          |
| LYS79                | PsaB LEU632  | 3.8          |
| ALA83                | PsaB GLN636  | 4.0          |
| PRO76                | PsaB GLU609  | 4.1          |
| LYS27                | PsaA GLN660  | 4.6          |
| VAL11                | PsaB PHE644  | 4.8          |
| CYS17                | PsaA TRP655  | 4.9          |
| HIS26                | PsaA GLN660  | 5.3          |
| THR49                | PsaB ASN611  | 5.4          |
| ASP50                | PsaF LYS16   | 5.6          |
| THR78                | PsaB GLU609  | 5.7          |
| ALA51                | PsaB ASN611  | 5.7          |

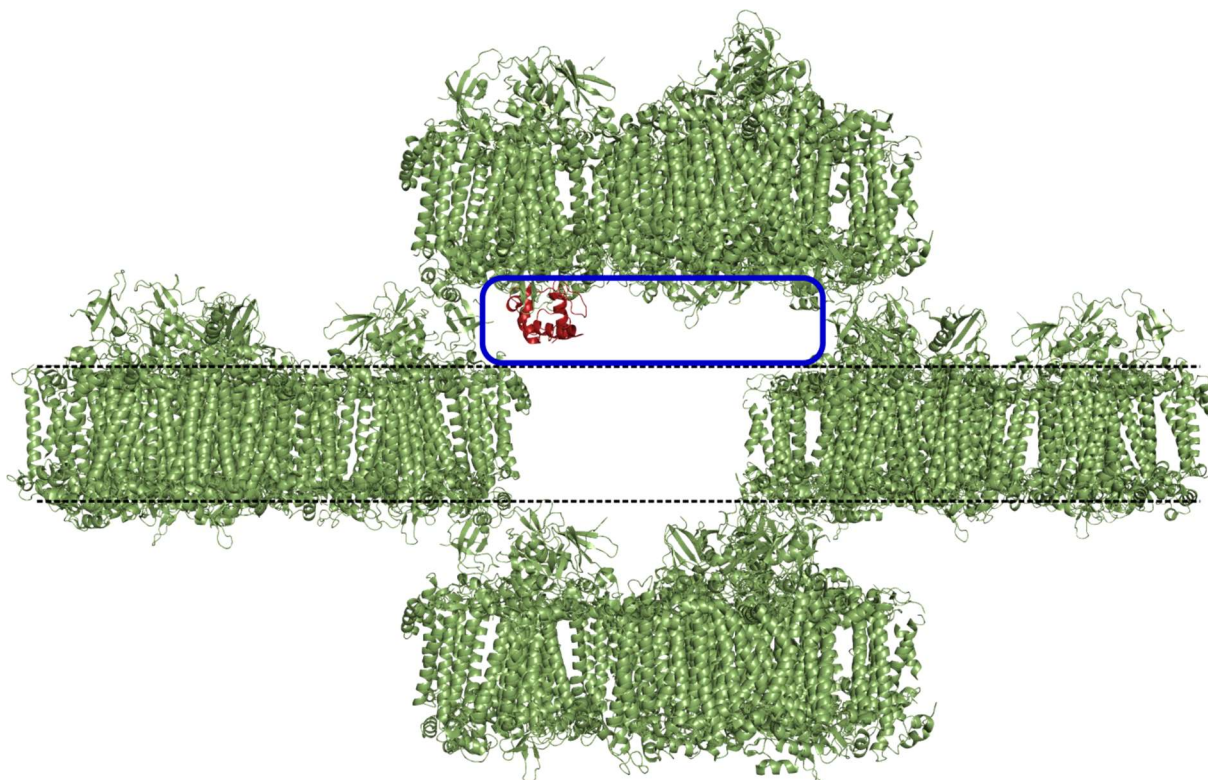

**Figure S12:** Photosystem I crystal lattice (green). The dotted lines mark the area where the DDM detergent belt may be localized. The remaining area where cyt  $c_{HH}$  could be positioned is highlighted by the blue box. A random docking state with cyt  $c_{HH}$  being close to P<sub>700</sub> is inserted into the crystal lattice (red). Since there are no clashes of the docked cyt  $c_{HH}$  with neighboring PS I monomers, the lattice of a co-crystal does not need to be altered as compared to the PS I crystal lattice. The lattice was visualized by using the symexp command from PyMOL, with the crystal structure PDB-ID: 1jb0 (4).

### Supplemental References

1. El-Mohsnawy, E., Kopczak, M. J., Schlodder, E., Nowaczyk, M., Meyer, H. E., Warscheid, B., Karapetyan, N. V., and Rögner, M. (2010) Structure and Function of Intact Photosystem I Monomers from the Cyanobacterium *Thermosynechococcus elongatus*. *Biochemistry*. **49**, 4740–4751
2. Laemmli, U. K. (1970) Cleavage of Structural Proteins during the Assembly of the Head of Bacteriophage T4. *Nature*. **227**, 680–685
3. Díaz-Moreno, I., Díaz-Quintana, A., Molina-Heredia, F. P., Nieto, P. M., Hansson, Ö., De la Rosa, M. A., and Karlsson, B. G. (2005) NMR Analysis of the Transient Complex between Membrane Photosystem I and Soluble Cytochrome  $c_6$ . *J. Biol. Chem.* **280**, 7925–7931
4. Jordan, P., Fromme, P., Witt, H. T., Klukas, O., Saenger, W., and Krauß, N. (2001) Three-dimensional structure of cyanobacterial photosystem I at 2.5 Å resolution. *Nature*. **411**, 909–917
